# Supplementary material
Source: PubMed Central journal article supplement (PMC3866527)
Supplement: NIHMS532512-supplement-01.pdf [file NIHMS532512-supplement-01.pdf]

McKay and Lieb, Data File S1. Confocal microscope images of cloned open chromatin regions used in transgenic reporter assays.

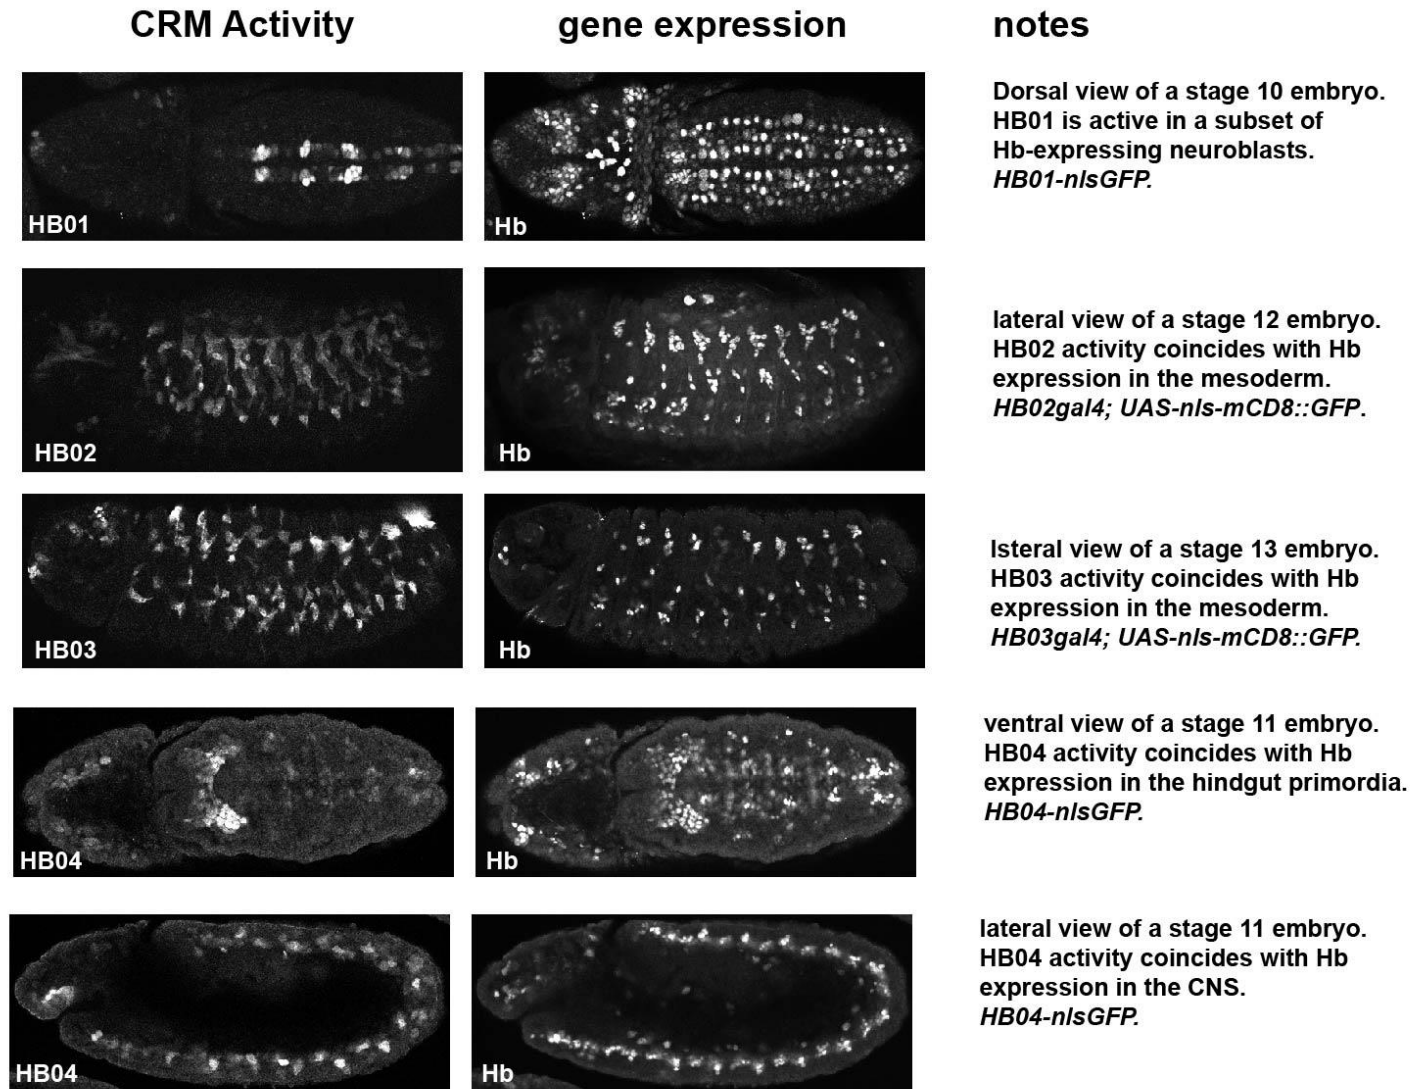

McKay and Lieb, Data File S1. Confocal microscope images of cloned open chromatin regions used in transgenic reporter assays.

| CRM Activity                                                                                  | gene expression                                                                                      | notes                                                                                                                                                                                                                                                            |
|-----------------------------------------------------------------------------------------------|------------------------------------------------------------------------------------------------------|------------------------------------------------------------------------------------------------------------------------------------------------------------------------------------------------------------------------------------------------------------------|
| 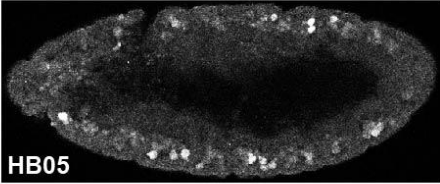<br>HB05     | <br>Hb             | lateral view of a stage 11 embryo. HB05 activity coincides with Hb expression in the CNS. <i>HB05-nlsGFP</i> .                                                                                                                                                   |
| <br>HB06     | <br><i>hb</i>      | (left) lateral view of a late cellular blastoderm embryo. HB06 is active in the anterior third. (right) <i>hb in situ</i> stain from BDGP showing a similar pattern of Hb expression (image 14893). <i>HB06-gal4; UAS-nlsGFP</i> .                               |
| <br>GSB01    | <br><i>gsb</i>     | (left) ventral view of stage 11 embryo. GSB01 is active in segmental stripes in the ectoderm that coincide with Wg expression. (right) <i>gsb in situ</i> stain from BDGP showing similar pattern of expression (image 76927). <i>HB01-gal4; UAS-cd8::GFP</i> .  |
| <br>GSB07   | <br><i>gsb</i>    | (left) lateral view of stage 11 embryo. GSB07 is active in segmental stripes in the ectoderm that coincide with Wg expression. (right) <i>gsb in situ</i> stain from BDGP showing similar pattern of expression (image 76896). <i>GSB01-gal4; UAS-cd8::GFP</i> . |
| <br>GSBN01 | <br><i>gsb-n</i> | (left) ventral view of stage 11 embryo. GSBN01 is active in ventral ectoderm and neuroblasts of CNS. (right) <i>gsb-n in situ</i> stain from BDGP showing similar pattern of expression (image 48256). <i>GSBN01-gal4; UAS-cd8::GFP</i> .                        |

| CRM Activity                                                                                     | gene expression                                                                                          | notes                                                                                                                                                                                                                                                                                                                                                                                                                |
|--------------------------------------------------------------------------------------------------|----------------------------------------------------------------------------------------------------------|----------------------------------------------------------------------------------------------------------------------------------------------------------------------------------------------------------------------------------------------------------------------------------------------------------------------------------------------------------------------------------------------------------------------|
| 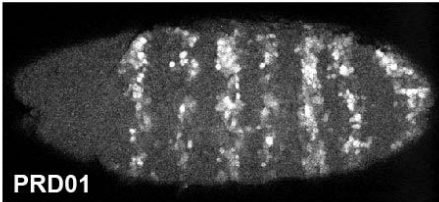 <p>PRD01</p>   |  <p><i>prd</i></p>     | <p>(left) ventral view of stage 10 embryo. PRD01 is active in the posterior half of each segment. (right) <i>prd in situ</i> stain from BDGP of lateral stage 8 embryo showing similar pattern of expression (image 70456).<br/><i>PRD01-gal4; UAS-nlsGFP.</i></p>                                                                                                                                                   |
|  <p>STAT01</p>  |  <p><i>Stat92E</i></p> | <p>(left) lateral view of stage 11 embryo. STAT01 is active in the trachea primordia, as well as the mesoderm, and low-level segmental ectoderm activity. (right) <i>Stat92E in situ</i> from BDGP of lateral stage 11 embryo showing similar pattern of expression (image 103987).<br/><i>STAT01-gal4; UAS-nlsGFP.</i></p>                                                                                          |
|  <p>STAT01</p>  |  <p><i>Stat92E</i></p> | <p>(left) ventral view of stage 10 embryo. STAT01 is active in cells of the CNS midline. (right) <i>Stat92E in situ</i> from BDGP showing similar pattern of expression (image 104024).<br/><i>STAT01-gal4; UAS-nlsGFP.</i></p>                                                                                                                                                                                      |
|  <p>BRK01</p>  |  <p><i>brk</i></p>    | <p>(left) ventral view of stage 11 embryo. BRK01 is active in cells of the CNS. (right) <i>brk in situ</i> image from BDGP showing similar pattern of expression in CNS, and tracheal primordia (image 663158).<br/><i>BRK01-gal4; UAS-nlsGFP.</i></p>                                                                                                                                                               |
|  <p>BRK01</p> |  <p><i>brk</i></p>   | <p>(left) lateral view of stage 13 embryo. BRK01 is active in cells of the dorsal epidermis, the tracheal primordia, and the ventral epidermis. BRK01 activity in the ventral epidermis extends across the midline, in contrast to expression of <i>brk</i>. (right) <i>brk in situ</i> image from BDGP showing expression in the dorsal and ventral epidermis (image 66343).<br/><i>BRK01-gal4; UAS-nlsGFP.</i></p> |

McKay and Lieb, Data File S1. Confocal microscope images of cloned open chromatin regions used in transgenic reporter assays.

| CRM Activity                                                                                     | gene expression                                                                                       | notes                                                                                                                                                                                                                                                                                                                                                            |
|--------------------------------------------------------------------------------------------------|-------------------------------------------------------------------------------------------------------|------------------------------------------------------------------------------------------------------------------------------------------------------------------------------------------------------------------------------------------------------------------------------------------------------------------------------------------------------------------|
| 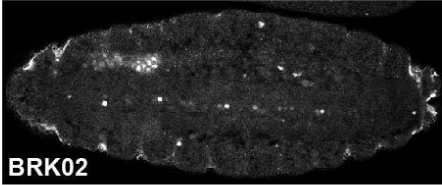<br>BRK02       | <br><i>brk</i>      | (left) ventral view of stage 13 embryo. BRK02 is active in cells of the CNS midline. BRK02 is also active in the salivary gland, unlike <i>brk</i> expression. (right) <i>brk in situ</i> image from BDGP showing similar expression (image 15121). <i>BRK02-gal4; UAS-nlsGFP</i> .                                                                              |
| <br>BRK02       | <br><i>brk</i>      | (left) lateral view of stage 11 embryo. BRK02 is active in cells of the CNS and of the anterior midgut primordia. (right) <i>brk in situ</i> image from BDGP showing similar expression (image 15108). <i>BRK02-gal4; UAS-nlsGFP</i> .                                                                                                                           |
| <br>CHINMO_01   | <br><i>chinmo</i>   | (left) ventral view of late stage embryo. CHINMO_01 is active in multiple small clusters of cells in the brain. CHINMO_01 is also ectopically active in the salivary gland. (right) <i>chinmo in situ</i> image from BDGP showing expression in the brain and posterior spiracles (image 70938). <i>CHINMO_01-gal4; UAS-cd8::GFP</i> .                           |
| <br>CHINMO_02  | <br><i>chinmo</i>  | (left) lateral view of stage 13 embryo. CHINMO_02 is active in several clusters of cells in the brain and posterior spiracles. <i>cd8::GFP</i> shows the projections of these cells outside of the brain. (right) <i>chinmo in situ</i> image from BDGP demonstrating expression in the brain at this stage (image 18191). <i>CHINMO_02-gal4; UAS-cd8::GFP</i> . |
| <br>CHINMO_04 | <br><i>chinmo</i> | (left) ventral view of a late-stage embryo. CHINMO_04 is active in a subset of ventral nerve cord cells, as well as clusters of cells in the brain. CHINMO_04 is also ectopically active in salivary glands. (right) <i>chinmo in situ</i> image from BDGP showing expression in the ventral nerve cord (image 70937). <i>CHINMO_04-gal4; UAS-cd8::GFP</i> .     |

McKay and Lieb, Data File S1. Confocal microscope images of cloned open chromatin regions used in transgenic reporter assays.

| CRM Activity                                                                                   | gene expression                                                                                         | notes                                                                                                                                                                                                                                                                                                                                                                                             |
|------------------------------------------------------------------------------------------------|---------------------------------------------------------------------------------------------------------|---------------------------------------------------------------------------------------------------------------------------------------------------------------------------------------------------------------------------------------------------------------------------------------------------------------------------------------------------------------------------------------------------|
| 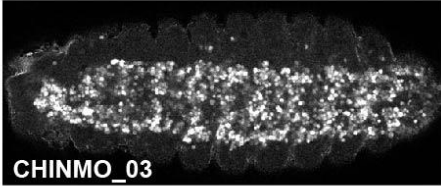<br>CHINMO_03 | <br><i>chinmo</i>     | (left) ventral view of late-stage embryo. CHINMO_03 is active in many cells of the ventral nerve cord. (right) <i>chinmo in situ</i> image from BDGP showing expression in the ventral nerve cord (image 70937).<br><i>CHINMO_03-gal4; UAS-nlsGFP.</i>                                                                                                                                            |
| <br>CHINMO_03 | <br><i>chinmo</i>     | (left) lateral view of a late stage embryo. CHINMO_03 is active in many cells of the brain and ventral nerve cord. (right) <i>chinmo in situ</i> from BDGP showing expression in the CNS (image 18191).<br><i>CHINMO_03-gal4; UAS-cd8::GFP.</i>                                                                                                                                                   |
| <br>EX01      | <br><i>ex-lacZ</i>    | (left) lateral view of a late-stage embryo stained for GFP. EX01 is active in the dorso-lateral epidermis. EX01 is not active in most cells of the mesoderm and endoderm. (right) <i>ex-lacZ</i> embryo stained for B-Gal showing similar pattern of expression.<br><i>EX01-gal4; UAS-nlsGFP.</i>                                                                                                 |
| <br>RHO_01  | <br>G<br><i>rho</i> | (left) third instar T3 leg disc stained for GFP. RHO_01 is active in concentric rings along the proximal-distal axis. RHO_01 is not active in imaginal discs of the dorsal appendages. (right) <i>rho in situ</i> image from Galindo et al (PMID 15965980) showing similar pattern of expression. RHO_01 is not active in the dorsal femoral tendons (arrows).<br><i>RHO_01-gal4; UAS-nlsGFP.</i> |

McKay and Lieb, Data File S1. Confocal microscope images of cloned open chromatin regions used in transgenic reporter assays.

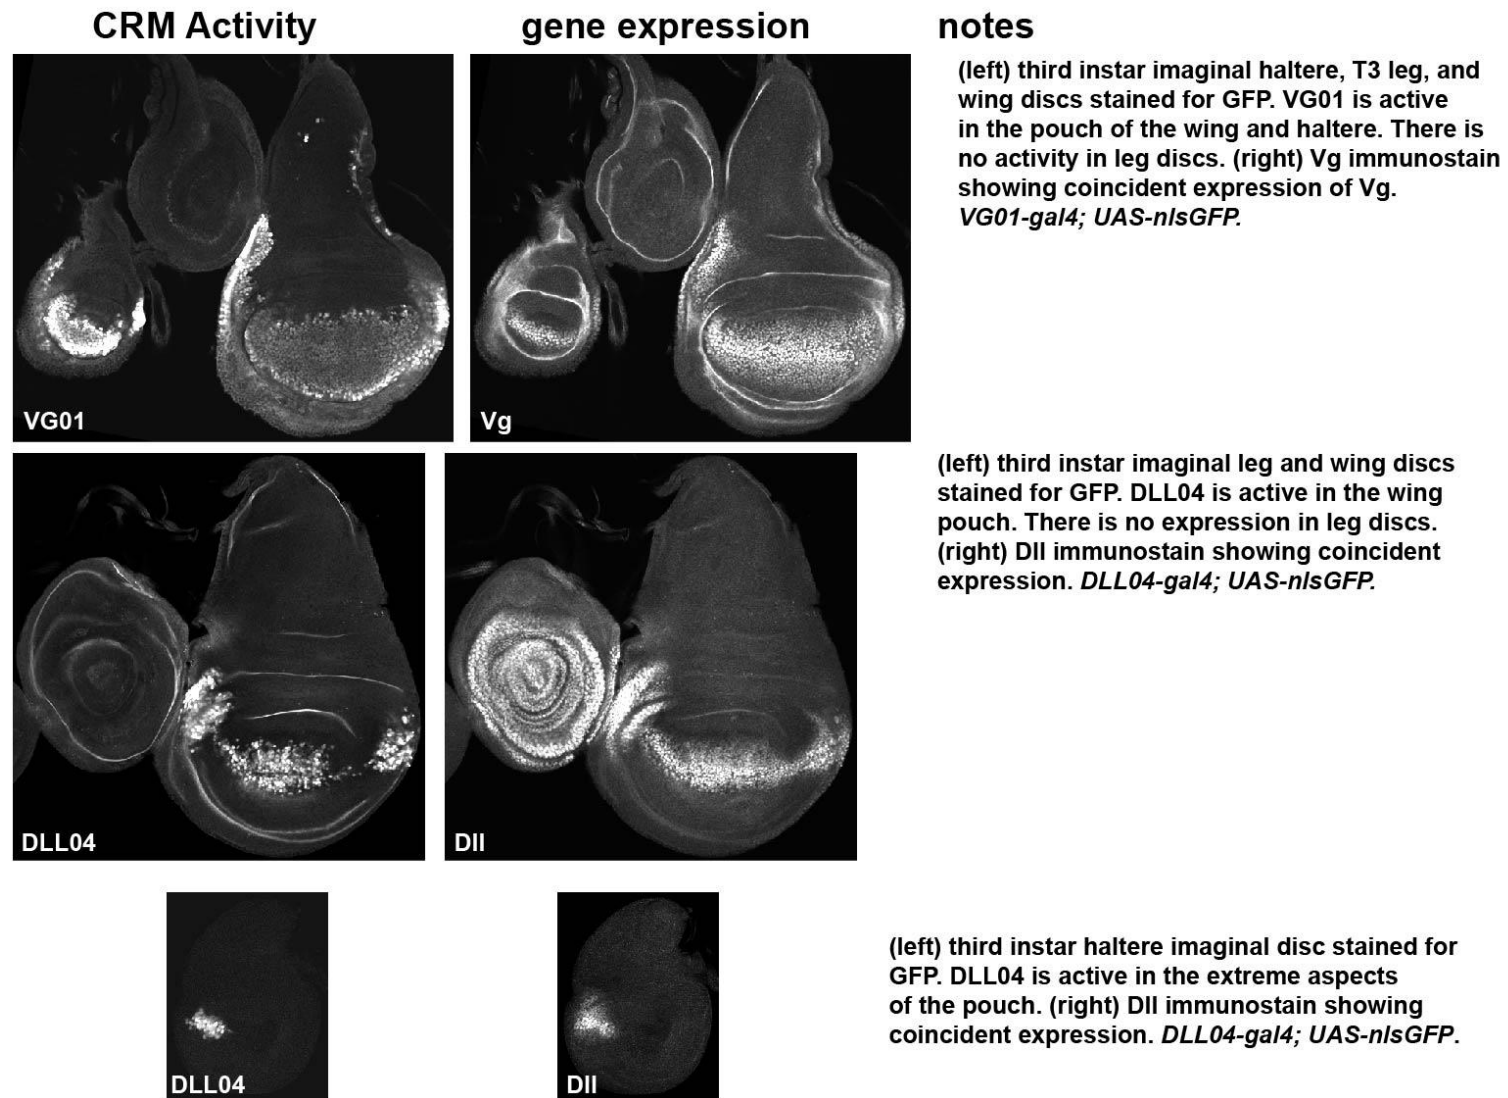

McKay and Lieb, Data File S1. Confocal microscope images of cloned open chromatin regions used in transgenic reporter assays.

### CRM Activity

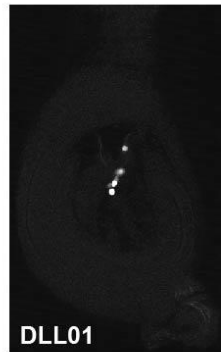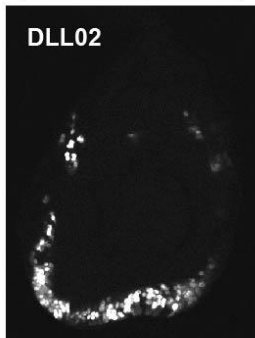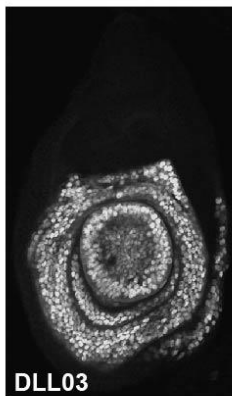

### gene expression

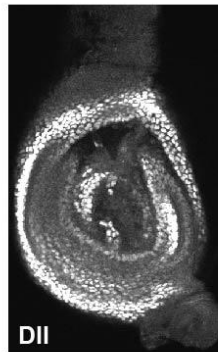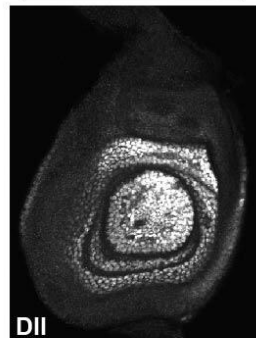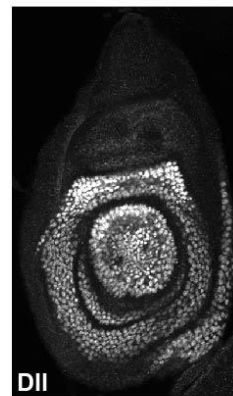

### notes

(left) third instar imaginal leg disc stained for GFP. DLL01 is active in 2-4 neurons in the basal leg. DLL01 is not active in dorsal appendage discs. (right) DII immunostain demonstrating coincident expression of DII.  
*DLL01-gal4; UAS-nlsGFP.*

(left) third instar imaginal leg disc stained for GFP. DLL02 is active in cells of the presumptive femur and trochanter. (right) DII immunostain from same leg. The activity of DLL02 is not coincident with DII except for several cells of the trochanter. DLL02 is also active in several cells of the dorsal appendage discs.  
*DLL02-gal4; UAS-nlsGFP.*

(left) third instar imaginal leg disc stained for GFP. DLL03 is active in the entire DII-expression domain, including the trochanter. There is no expression in dorsal appendage discs (right) DII immunostain.  
*DLL03-gal4; UAS-nlsGFP.*

McKay and Lieb, Data File S1. Confocal microscope images of cloned open chromatin regions used in transgenic reporter assays.

**CRM Activity**

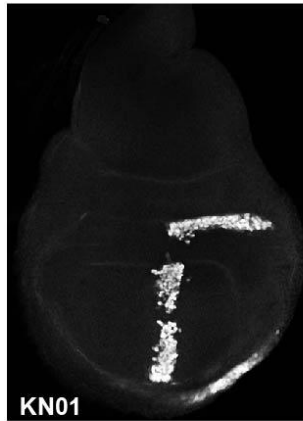

**gene expression**

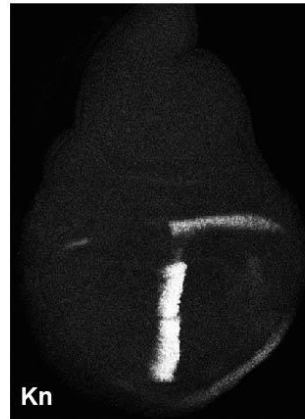

**notes**

(left) third instar wing imaginal disc stained for GFP. KN01 is active in a stripe of cells along the anterior-posterior boundary in the wing pouch, and in posterior hinge cells, dorsally and ventrally. (right) Kn immunostain demonstrating coincident expression of Knot protein.  
*KN01-gal4; UAS-nlsGFP.*

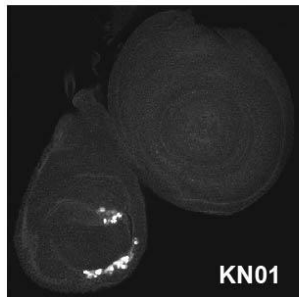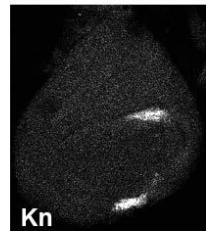

(left) third instar haltere and wing imaginal discs stained for GFP. In the haltere, KN01 is active in the hinge region, dorsally and ventrally, but it is not active in the presumptive pouch. KN01 is not active in leg imaginal discs. (right) Kn immunostain demonstrating coincident expression of Knot protein in the haltere imaginal disc.  
*KN01-gal4; UAS-nlsGFP.*

Where indicated, *in situ* images were obtained from BDGP (Tomancak et al., Genome Biology, 2007).
